# Supplementary material for: Musashi-1 Enhances Glioblastoma Cell Migration and Cytoskeletal Dynamics through Translational Inhibition of Tensin3
Source: PubMed Central journal article supplement (PMC5562834; doi:10.1038/s41598-017-09504-7), 2017-08-18

1 **Musashi-1 Enhances Glioblastoma Cell Migration and Cytoskeletal**

2 **Dynamics through Translational Inhibition of Tensin3**

3 Hsiao-Yun Chen<sup>1\*</sup>, Liang-Ting Lin<sup>2,3,6\*</sup>, Mong-Lien Wang<sup>2,4</sup>, Benoit Laurent<sup>7</sup>, Chih-  
4 Hung Hsu<sup>7</sup>, Chih-Ming Pan<sup>4,9</sup>, Wan-Ru Jiang<sup>3</sup>, Pau-Yuan Chen<sup>8</sup>, Hsin-I Ma<sup>10</sup>, Yi-Wei  
5 Chen<sup>1,11</sup>, Pin-I Huang<sup>1,11</sup>, Arthur Chiou<sup>5</sup>, Shih-Hwa Chiou<sup>1,2,3,4,12</sup>

6 **Supplementary Information**

7 **SUPPLE. FIGURE LEGEND**

8 **Supple. Figure 1. MSI1 promoted GBM cells migration.**

9 (A) 05MG cells transiently transfected with siRNA against MSI1 (siMSI1#1 and  
10 siMSI1#2) or scrambled siRNA control (siCON), and (C) U251 cells transiently  
11 transfected with Flag-tagged MSI1 (FlagMSI1) or Flag control (Flag) were subjected  
12 to Western blotting to assess MSI1 protein levels. (B) MSI1-depleted 05MG cells and  
13 (D) MSI1-overexpressed U251 cells were subjected to a 24-hour Transwell migration  
14 assay. The number of migratory cells were counted and presented as percentages  
15 relative to the controls. All values are mean + SEM. \*, P < 0.05 (relative to the control  
16 group).

17 **Supple. Figure 2. MSI1-regulated genes indicated the relationship with cell**  
18 **migration pathway through bioinformatic analysis**

19 (A) The gene list was analyzed by DAVID (<https://david.ncifcrf.gov/>) and illustrated  
20 by QuickGO (<https://www.ebi.ac.uk/QuickGO/>) based on the significance of each GO  
21 term using False discovery rate (FDR) as the criterium. (B) Both gene expressive  
22 profiles from microarray and RIP-seq were demonstrated as log ratio and FPKM on a  
23 X-Y plot and the genes with higher correlation between the two axes were highlighted  
24 and further subjected to Gene Ontology analysis;

25 **Supple. Figure 3. MSI1 suppressed TNS3 translation through binding to 3'UTR**  
26 **of TNS3.**

27 (A) 05MG cells transiently transfected with siRNA against MSI1 (siMSI1#1 and  
28 siMSI1#2) or scrambled siRNA control (siCON) were subjected to Western blotting to  
29 assess TNS3 and MSI1 protein levels. (B) Schematic diagram of human TNS3 mRNA  
30 and the designed locations of amplified regions for RNA-Chip assay. (C) Schematic  
31 representation of the reporter constructs containing the firefly luciferase coding  
32 sequence fused to wildtype or mutated TNS3-3'UTR. The predicted binding site are  
33 noted in colored ovals and the mutated residues are marked with a cross in the ovals.  
34 (D) 05MG cells were transfected with siMSI1 for 24 hours or (E) U251 cells were  
35 transfected with FlagMSI1 for 24 hours and treated with 10  $\mu$ g/ml of cycloheximide  
36 (CHX) to block protein synthesis. Cellular proteins were harvested at indicated time  
37 points after CHX treatment, and analyzed by Western blot (top). The intensity of TNS3  
38 blot at each time point were calculating and presented as relative percentage in  
39 comparison to the 0 hours' time point (Bottom).

40 **Supple. Figure 4. MSI1 promoted cell migration through regulation TNS3/RhoA-**  
41 **GTP signaling pathway in GBM.**

42 (A) MSI1- and TNS3-depleted 05MG cells were subjected to a TransWell migration  
43 assay. (B) MSI1- and TNS3-depleted 05MG cells were subjected to wound-healing  
44 assay for 10 hours. (C) MSI1 and TNS3 protein levels were assessed in 05MG cells  
45 transiently transfected with siMSI1#1 and/or siTNS3#1 using Western blotting. Wound  
46 healing assay was performed in MSI1- and TNS3-depleted 05MG cells, and the number  
47 of migratory cells were calculated and shown in the graphs. (D-E) MSI1- and TNS3-  
48 depleted 05MG cells were seeded in 3.5-cm plates before using time lapse microscopy  
49 for single-cell tracking (1 frame/5 min for 24 hr). The tracks of single cell were shown  
50 in the left panel and the mean tracks of 15 cells were shown in the middle panel. The  
51 mean motility and speed of cells was determined by the manual tracking plugin of  
52 Image J in three independent analyses and shown as bar charts in the right. (F) MSI1-  
53 and TNS3-depleted 05MG cells were stained for F-actin (red) and DAPI (blue). The  
54 ratio of mean aspect (defined as the ratio of the length of major and minor axes, AR)  
55 were shown in the right (n = 100). (G) MSI1 regulated cell viscoelasticity through  
56 inhibiting TNS3. The elastic modulus ( $G'$ ) and viscous modulus ( $G''$ ; at 10 Hz) were  
57 analyzed by MetLab software. Data are expressed as mean  $\pm$  SEM. All values are mean  
58 + SEM. \*,  $P < 0.05$  (relative to the control group). #,  $P < 0.05$  (relative to the siTNS3

59 group).

60 **Supple. Figure 5. Uncropped blots from original scanned raw data of designated**  
61 **figures.**

62

## 63 **MATERIALS AND METHODS**

### 64 **Transfection**

65 Plasmid transfection was carried out using jetPEI DNA transfection reagent (Polyplus  
66 jetPEI®, Cat #101-10, DNA Transfection reagent, Huntingdon, UK) according to  
67 manufacturer's instructions. siRNA against MSI1 (siMSI1#1: SASI\_Hs01\_00145278,  
68 siMSI1#2: SASI\_Hs01\_00145277), TNS3 (siTNS3#1: SASI\_Hs01\_00166414,  
69 siTNS3#2: SASI\_Hs01\_00166415 ) and scrambled siRNA control (MISSION® siRNA  
70 Universal Negative Control #1) were purchased from SIGMA siRNA smart pools.  
71 Transient siRNA transfection was carried out using INTERFERin siRNA transfection  
72 reagent (Polyplus INTERFERin®, Cat #409-10, siRNS transfection reagent) according  
73 to the manufacturer's instruction. Cell-based experiments were performed after 48  
74 hours of incubation. The information of plasmids was listed in Suppl. Table 1.

### 75 **Western blotting**

76 All total protein lysates were collected with RIPA buffer (Millipore, Cat #20-188, RIPA  
77 Lysis Buffer, 10X) containing 1% protease inhibitor (SIGMA, Cat #05892791001  
78 ROCHE, cOmplete™ ULTRA Tablets, Mini, EDTA-free, EASYpack Protease Inhibitor  
79 Cocktail). Equal amount of total proteins was separated by electrophoresis on  
80 SDS/PAGE. After the proteins were transferred onto a polyvinylidene difluoride  
81 membrane (Millipore, Cat # IPVH00010, Immobilon-P Membrane, PVDF, 0.45 µm,  
82 26.5 cm x 3.75 m roll), the blots were incubated in blocking buffer (1 X PBST and 5%  
83 skim milk) for 1 hour at room temperature and then hybridized with primary antibodies  
84 overnight at 4°C, followed by incubation with horseradish peroxidase-conjugated  
85 secondary antibody for 1 hour at room temperature. The blots were obtained by X-ray  
86 film exposure. The primary antibodies used in this study were anti-Flag (Sigma-Aldrich  
87 Co. LLC., St. Louis, MI, USA, F1804), anti-Musashi1 (cell signaling, #5663), anti-  
88 TNS3 (SIGMA, #SAB4200416), anti-RhoA (cell signaling, #2117) and anti-β-actin  
89 (sigma, A5316). The secondary antibody used in this study were anti-Rabbit-HRP (cell  
90 signaling, #7074) and anti-Mouse-HRP (cell signaling, #7076).

### 91 **Luciferase reporter assay**

92 U251 cells were co-transfected with pMIR-control constructs, TNS3-3'UTR-WT,  
93 TNS3-3'UTR-mut1, TNS3-3'UTR-mut2 and Flag-control or Flag-MSI1 using jetPEI  
94 DNA transfection reagent in 24-well plate. The pMIR-REPORT  $\beta$ -gal control Plasmid,  
95 containing  $\beta$ -gal luciferase, was used as an internal control. The cells were cultured at  
96 37 °C in 5 % CO<sub>2</sub> for additional 24 hrs. The cells were harvested and the luciferase  
97 activity was measured using dual luciferase assay system (Thermo, Cat#T1003, Dual-  
98 Light® luminescent reporter gene assay system) according to the manufacturer's  
99 instructions.

#### 100 **Quantitative real-time PCR (qPCR)**

101 Total RNA were isolated from GBM cells using TRIzol (Life Technologies Inc.,  
102 Carlsbad, CA, USA) followed by phenol:chloroform purification and ethanol  
103 precipitation. Reverse transcription were carried out using SuperScript III reverse  
104 transcriptase (Life Technologies Inc., Carlsbad, CA, USA). Oligonucleotides (Suppl.  
105 Table II) were designed using Primer Express 2.0 (Applied Biosystems, Foster City,  
106 CA, USA). The real-time-PCR was performed with power SYBR Green PCR Master  
107 Mix (Applied Biosystems, Foster City, CA, USA) according to manufacturer's  
108 instruction. Signals were detected with 7900HT Fast Real-time PCR system (Applied  
109 Biosystems, Foster City, CA, USA). The expression level of each gene was normalized  
110 to endogenous beta-actin and experimental control through  $\Delta$ Ct methods.

#### 111 **Immunofluorescence (IF) staining**

112 Cells were sub-cultured on glass coverslips for 24 hrs. The cells were fixed with 4 %  
113 paraformaldehyde for 10 mins, permeabilized with 0.1% Triton X-100 for 10 mins, NP-  
114 40 for 10 mins, and incubated with blocking buffer (5% BSA) for 1 hour at room  
115 temperature. The samples were immune-stained with the indicated primary antibodies  
116 overnight at 4°C, followed by FITC-labeled or PE-labeled secondary antibodies for  
117 imaging. The primary antibodies used in this study were anti-F-Actin (Thermo, Cat #  
118 R415, Rhodamine Phalloidin), DAPI (SIGAM, Cat #D9542).

#### 119 **Immunohistochemistry staining and immunoblotting (IHC)**

120 Tumor specimens from mice and GBM patients were fixed with 4% paraformaldehyde

121 (Sigma-Aldrich Co., St. Louis, MI, USA). Sections were deparaffinized and rehydrated,  
122 and subjected to antigen retrieval by boiling for 30 mins in 10 mmol/L (pH 6) citrate  
123 buffer (Sigma-Aldrich Co., St. Louis, MI, USA). Sections were cooled in TPBS for 10  
124 mins before treating with 3% H<sub>2</sub>O<sub>2</sub>. Sample were blocked in 5 mg/ml BSA (Sigma-  
125 Aldrich Co., St. Louis, MI, USA) for 30 mins before hybridizing with 1/100 diluted  
126 primary antibodies anti-Flag (Sigma-Aldrich Co. LLC., St. Louis, MI, USA, F1804),  
127 anti-TNS3 (SIGMA, #SAB4200416) overnight at 4°C. Signals were amplified by the  
128 TSA Biotin System (PerkinElmer, Waltham, MA) following the manufacturer's  
129 instruction and the samples were counterstained with hematoxylin. The sections were  
130 examined under Olympus BX61 microscope (Olympus Corp., Tokyo, Japan), and three  
131 field of views were randomly selected and photographed for evaluation.

132

133 **Suppl. Table I. List of the primers used for plasmid construction**

| Name              | Sequence (5'-3')                     |
|-------------------|--------------------------------------|
| MSI-F             | ATGGAGACTGACGCGCCCCAGCCCG            |
| MSI1-R            | TCAGTGGTACCCATTGGTGAAGGCT            |
| MSI1-F-HindIII    | AGAAGCTTATGGAGACTGACGCGCCCCAGC       |
| MSI1-R-BamHI      | AGGATCCTCAGTGGTACCCATTGGTGAAGG       |
| TNS3-3'UTR-F      | TTCGTATCAAAGGTCATGATTGGT             |
| TNS3-3'UTR-R      | GGGTACACAAATACCGTCTCACGG             |
| TNS3-3'UTR-MutA-F | CGTCTTCTCTGCCTTAGGCAGGCATATTTTACTTT  |
| TNS3-3'UTR-MutA-R | GAAAGTAAAAATATGCCTGCCTAAGGCAGAGAAGAC |
| TNS3-3'UTR-MutB-F | CTATAAATCTTTTGTTCGCAGCATTTTCTCTGCTCC |
| TNS3-3'UTR-MutB-R | GGAGCAGAGAAAATGCTGCGACAAAAGATTATAG   |

134

135 **Suppl. Table II. Sequences of the primer used for real-time PCR analysis**

| Gene Name      | Forward sequence     | Reverse sequence       |
|----------------|----------------------|------------------------|
| MSI1           | TTGACAAAACCACCAACCGG | CCTCCTTTGGCTGAGCTTTCTT |
| TNS3           | AGACGATGACCCCTGGCTAT | CGTGGTTCACGTCCTCCTTT   |
| $\beta$ -actin | GCGTGACATTAAGGAGAAG  | GAAGGAAGGCTGGAAGAG     |
| GAPDH          | AGAAGGCTGGGGCTCATTTG | AGGGGCCATCCACAGTCTTC   |

136

137 **Suppl. Table III. Sequences of the primer used for RNA ChIP analysis**

| TNS3 mRNA Seq. | Forward sequence      | Reverse sequence       |
|----------------|-----------------------|------------------------|
| 813-1111       | TGCAGCCTTCCCAAAAACGG  | CGAGCGGTATTTCTTGTGGTAG |
| 1243-1523      | ATTAGTCTTCTCTGCCACGCC | CAGACAAGGTGTGGTCACTGT  |
| 1760-2032      | GCTGCTCTGAAGGATCGGG   | TCGACTCCCAAAAGTCCGCT   |
| 2310-2561      | CACATCCCCCTGACACACAG  | TGTCTGGAGACACAGAGCCA   |
| 2733-3021      | AATGTGCATGGGGAAAGGCT  | CAGCTTCGTGGTTCACGTC    |
| 3329-3559      | TCAGAGCTCCAGGCTCCTTT  | CCACCGTGAGAAAGTTGTGG   |
| 3779-4029      | CCCAAATGTCCTTCCCGACT  | TGGCCAAATCTCCAGCTTTCT  |

|           |                       |                           |
|-----------|-----------------------|---------------------------|
| 4229-4526 | GAAAGTTCTCCCCAGACGGC  | ACTTCCTGTCTTGTGGGTCC      |
| 4858-5102 | AACATCACCGTGAATTGGCCT | AAGCATGGCAGTCACTCGG       |
| 5271-5448 | CGAAGGTTTGTGCAAGTCAGG | TTCTCCTCTCGGTCCTCACAG     |
| 5726-5935 | TTCCCCGATTGTGGATGACT  | CACAACCACACATGGTCCCC      |
| 6285-6514 | CCATTCTTAGGCCACACTGGT | AATGAGGCACTTGGTTTGGTG     |
| 6778-7027 | AGTGCAGGCCAGGTTCTTA   | ATTCCCCGATGCCCTTGACC      |
| 7291-7548 | CCTGGGGAGTAAATGCGGAG  | AAGGAGCAGAGAAAATGACTATACA |

138

139

140

141



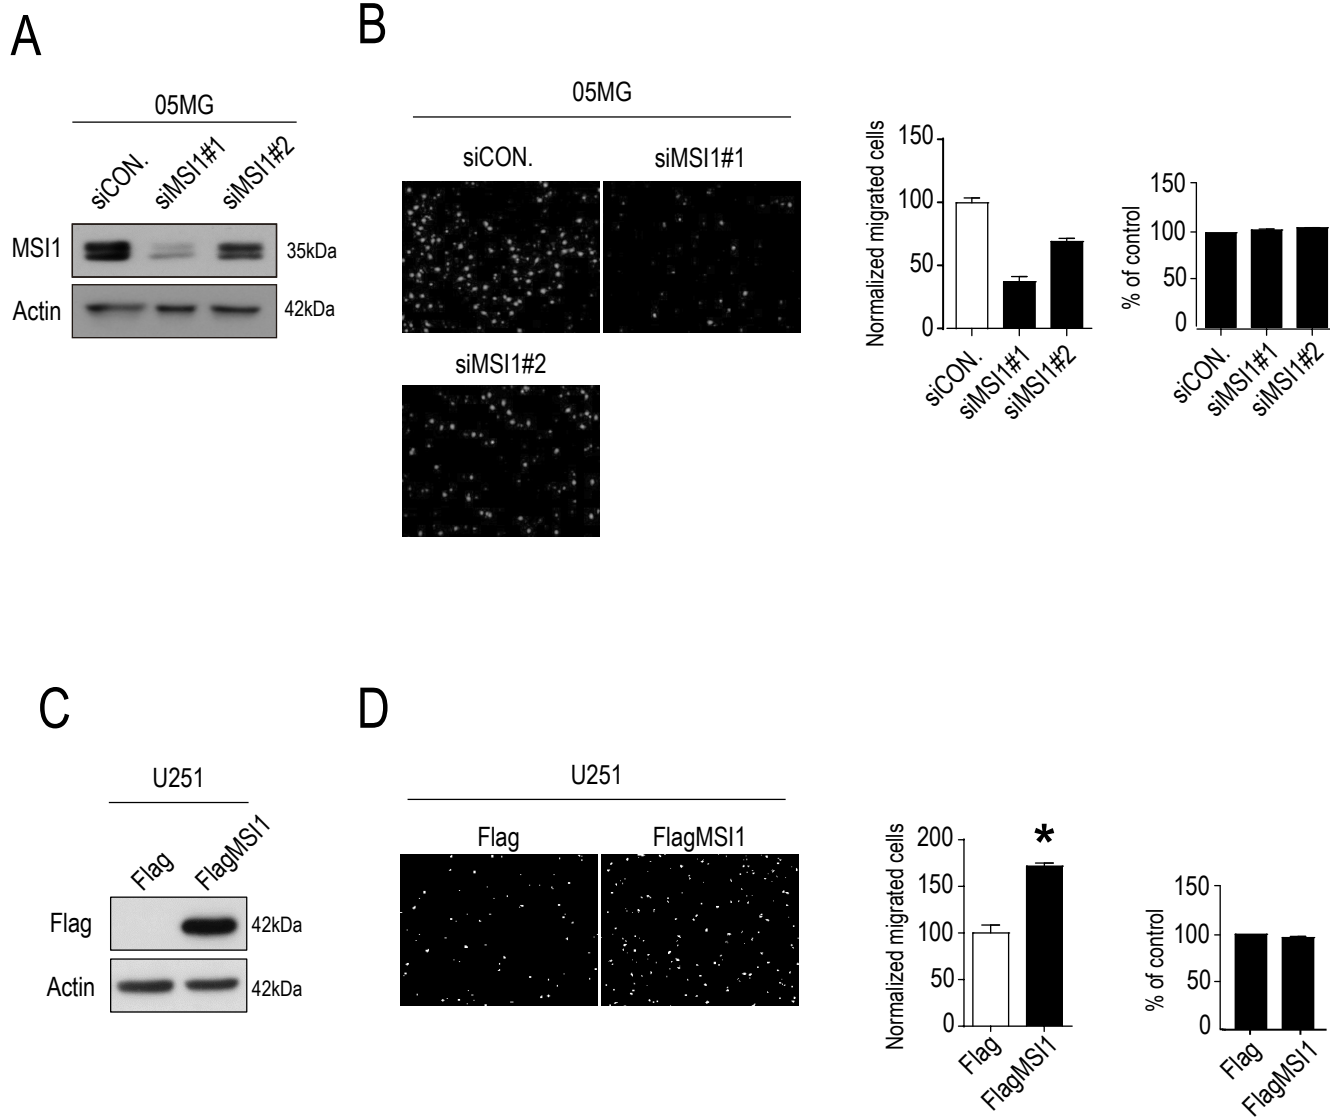

A

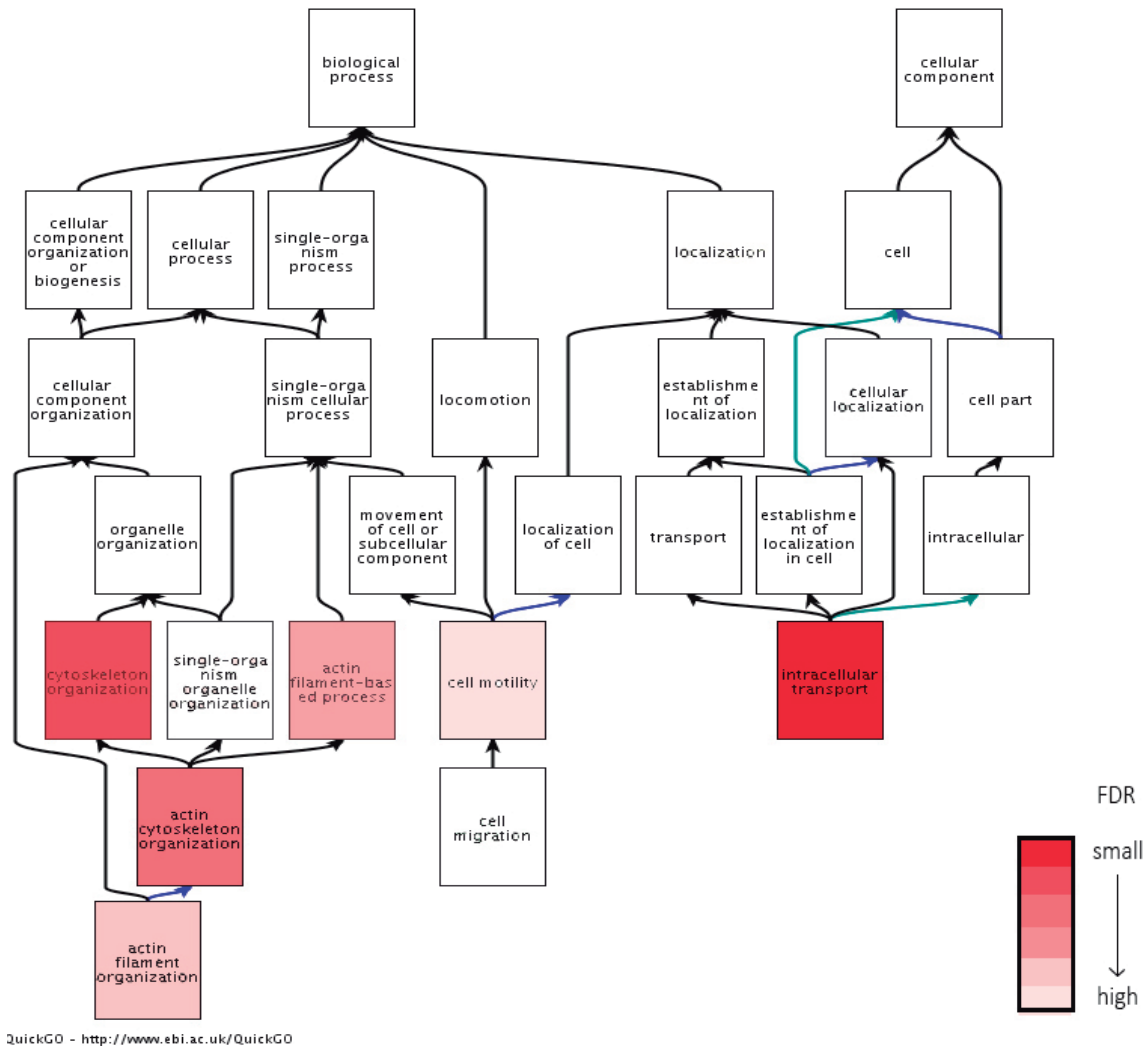

B

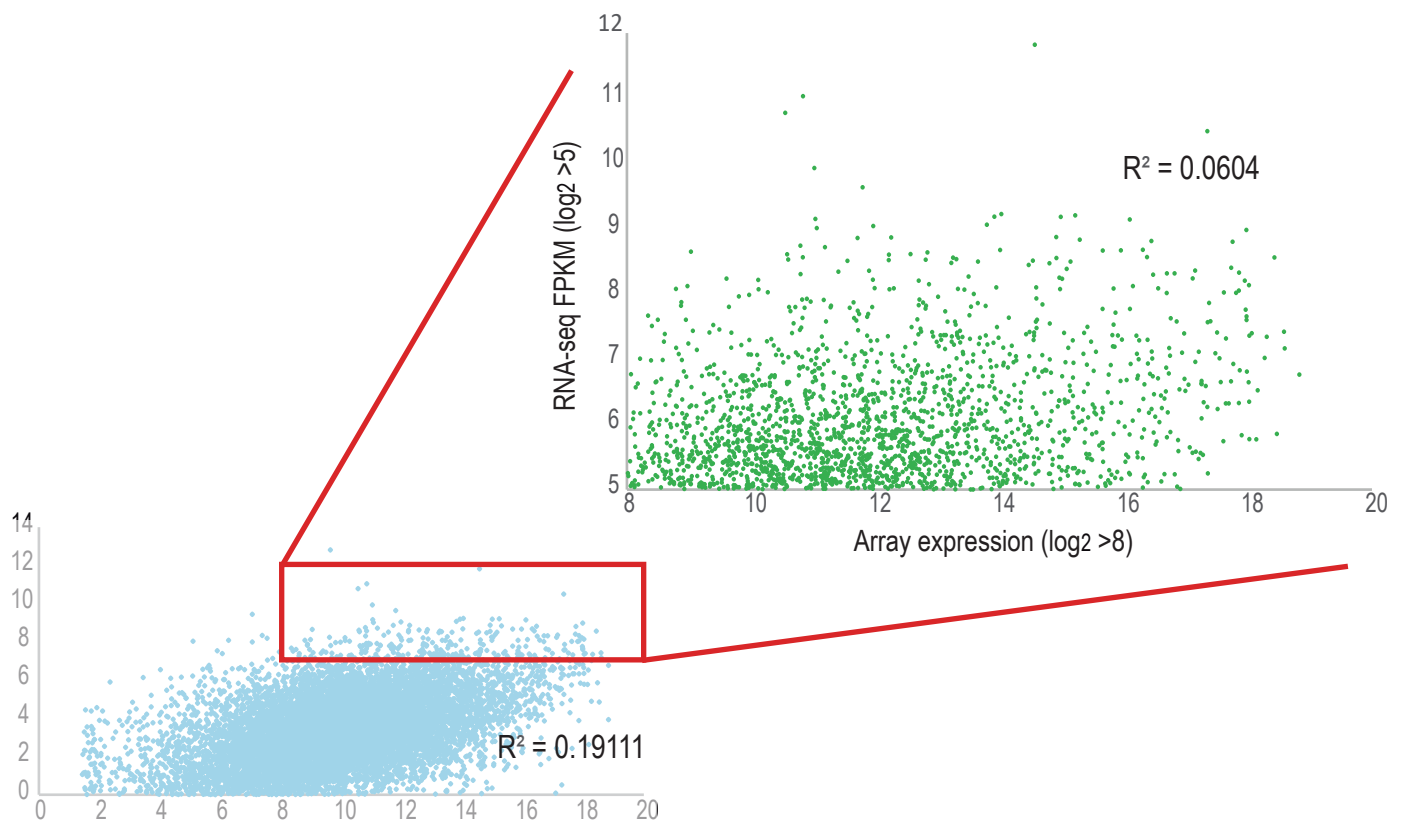

A

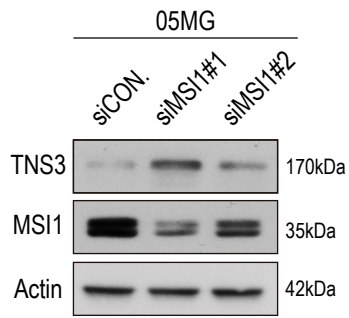

B

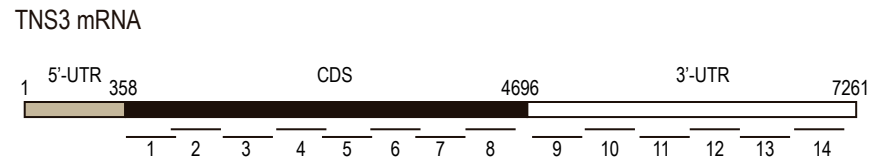

C

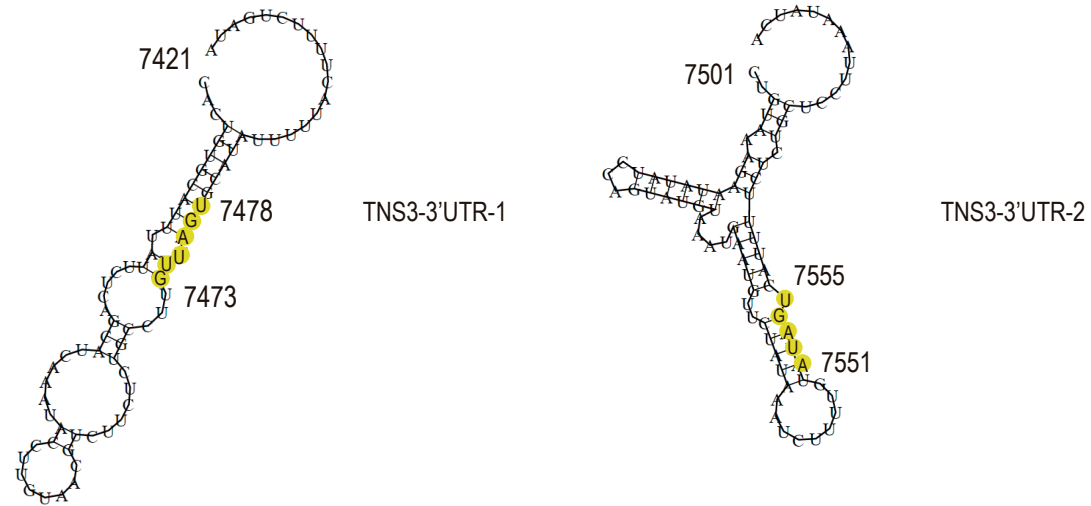

D

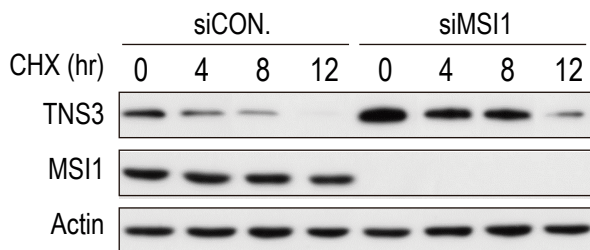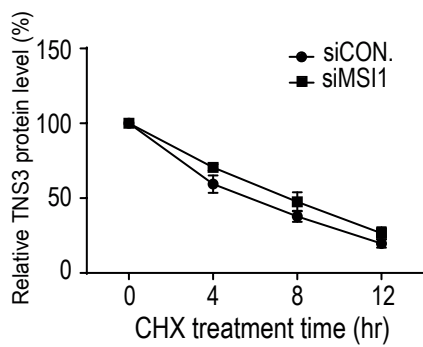

E

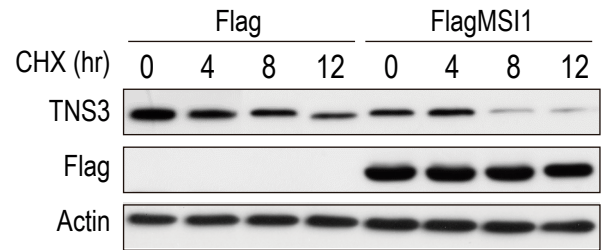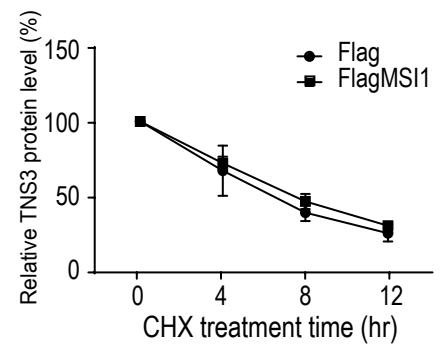

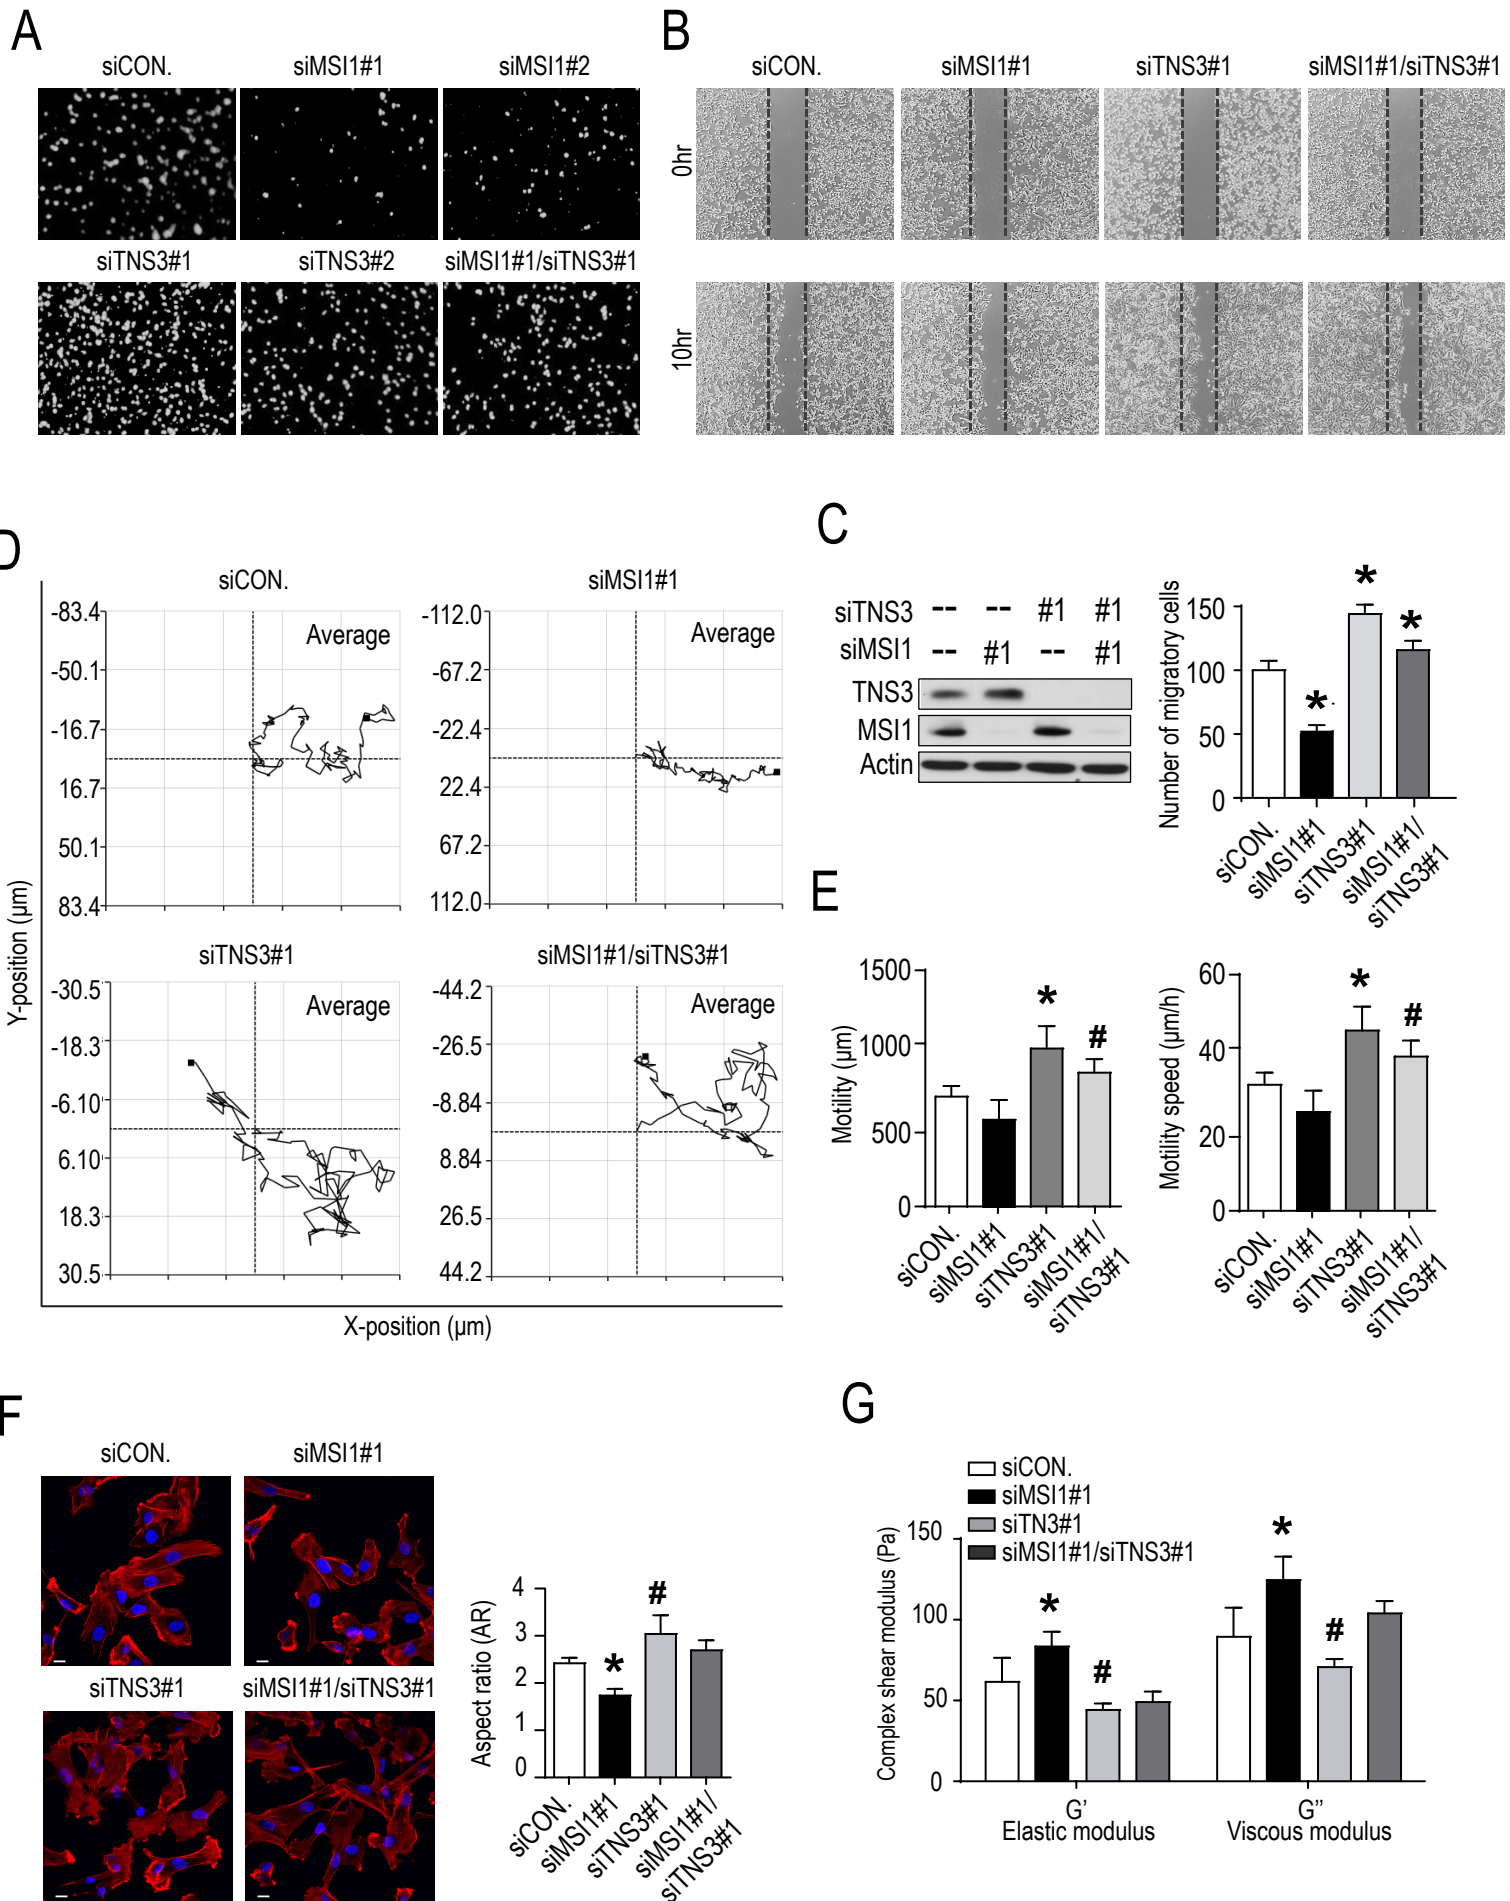

Supplement: 41598_2017_9504_MOESM1_ESM.pdf [file 41598_2017_9504_MOESM1_ESM.pdf]
